# Supplementary material for: How urban impervious surface shapes bird foraging behavior in an arid city
Source: PeerJ. 2025 Sep 23;13:e19980. doi: 10.7717/peerj.19980 (PMC12466499; doi:10.7717/peerj.19980)
Supplement: Supplemental Information 1 — Dataset of first bird species to visit feeding stations. Data include date, time, and location of feeding stations. [file peerj-13-19980-s001.xlsx]

## Sheet: Data
Trial Number	Latitude/Longitude Coordinates	Site Name	Itree Impervious Surface Measure (%)	Date of Collection	Time of Collection	Time of First Bird Visit (seconds)	Species of First Visitor (Common Name)	Other Visitors (Within 20 minutes)	Item used as starting point										HOSP Time
1	33.36511, -111.93479	Kiwanis Park	0.26	2024-09-02	6:30am- 8:30am	428	Abert's Towhee		Trashcan
2	33.38279, -112.30236	Base & Meridian	0.36	2024-10-09	6:30-9:15am	479	Abert's Towhee	House Wren	Trash on ground
3	33.23481, -111.77051	Veterans Oasis Park	0.34	2024-08-11	7:30 am-9:30 am	1000	Cactus Wren		Trashcan
4	33.419039, -112.072469	Nina Mason Pulliam Rio Salado Audubon Center	0.24	2024-07-16	8:15 am- 11:40 am	1024	Curve-Billed Thrasher		Trashcan
5	33.23511, -111.77118	Veterans Oasis Park	0.34	2024-08-11	7:30 am-9:30 am	485	Eurasian Collared Dove		Trashcan
6	33.60873, -112.16047	ASU West Campus	0.7	2024-10-06	6:50-9:50am	151	European Starling		Trashcan
7	33.38319, -112.30504	Base & Meridian	0.36	2024-10-09	6:30-9:15am	873	Greater Roadrunner		Trash on ground
8	33.306962, -111.676765	Polytechnic Campus	0.58	2024-07-11	6 am-9:30 am	69	Great-Tailed Grackle		Trashcan
9	33.305479, -111.676548	Polytechnic Campus	0.58	2024-07-11	6 am-9:30 am	194	Great-Tailed Grackle		Trashcan
10	33.305144, -111.675459	Polytechnic Campus	0.58	2024-07-11	6 am-9:30 am	70	Great-Tailed Grackle		Trashcan
11	33.305457, -111.676354	Polytechnic Campus	0.58	2024-07-11	6 am-9:30 am	596	Great-Tailed Grackle		Trashcan
12	33.432915, -111.905438	Tempe Marketplace	0.96	2024-07-07	6 am-9:30 am	323	Great-Tailed Grackle		Trashcan
13	33.432801, -111.905214	Tempe Marketplace	0.96	2024-07-07	6 am-9:30 am	12	Great-Tailed Grackle		Trashcan
14	33.220565, -111.583374	Queen Creek Olive Mill	0.28	2024-07-23	6 am- 9:30 am	1078	Great-Tailed Grackle		Trashcan
15	33.22649, -111.59119	Schnepf Farms	0.4	2024-09-08	7:30am-9:30 am	17	Great-Tailed Grackle		Dumpster
16	33.225227, -111.590586	Schnepf Farms	0.4	2024-09-13	7:30am-9:30 am	136	Great-Tailed Grackle		Trashcan
17	33.225078, -111.590875	Schnepf Farms	0.4	2024-09-13	7:30am-9:30 am	347	Great-Tailed Grackle		Trashcan
18	33.224628, -111.589373	Schnepf Farms	0.4	2024-09-13	7:30am-9:30 am	58	Great-Tailed Grackle		Trashcan
19	33.23477, -111.76996	Veterans Oasis Park	0.34	2024-08-06	7 am-9 am	329	Great-Tailed Grackle	Eurasian Collared Dove	Trashcan
20	33.31072, -111.74482	Santan Village	0.9	2024-08-09	6:30 am-9 am	794	Great-Tailed Grackle		Trashcan
21	33.31121, -111.74108	Santan Village	0.9	2024-08-09	6:30 am-9 am	14	Great-Tailed Grackle		Trashcan
22	33.31101, -111.74311	Santan Village	0.9	2024-08-28	7am-9 am	153	Great-Tailed Grackle	Eurasian Collared Dove	Trashcan
23	33.31056, -111.74312	Santan Village	0.9	2024-08-28	7am-9 am	208	Great-Tailed Grackle		Trashcan
24	33.30909, -111.74518	Santan Village	0.9	2024-08-28	7am-9 am	423	Great-Tailed Grackle		Trashcan
25	33.30764, -111.74535	Santan Village	0.9	2024-08-28	7am-9 am	11	Great-Tailed Grackle		Trashcan
26	33.37069, -111.93611	Kiwanis Park	0.26	2024-09-02	6:30am- 8:30am	291	Great-Tailed Grackle	Rock Pigeon	Trashcan
27	33.36465, -111.93613	Kiwanis Park	0.26	2024-09-06	7:30am-9:30am	634	Great-Tailed Grackle		Trashcan
28	33.36405, -111.93475	Kiwanis Park	0.26	2024-09-06	7:30am-9:30am	964	Great-Tailed Grackle		Trashcan
29	33.42550, -111.92588	Tempe Lot 59 East & ASU Practice Fields	0.81	2024-09-18	6:45-9:30am	186	Great-Tailed Grackle		Trashcan
30	33.42612, -111.92369	Tempe Lot 59 East & ASU Practice Fields	0.81	2024-09-18	6:45-9:30am	651	Great-Tailed Grackle		Trashcan
31	33.41648, -111.93161	ASU SDFC Fields and Surrounding Area	0.81	2024-09-20	6:30-9:45am	157	Great-Tailed Grackle		Trashcan
32	33.416518, -111.933380	ASU SDFC Fields and Surrounding Area	0.81	2024-09-20	6:30-9:45am	304	Great-Tailed Grackle		Trashcan
33	33.453834, -112.074742	Civic Space Park	0.8	2024-10-13	7-9:30am	249	Great-Tailed Grackle		Trashcan
34	33.307020, -111.677632	Polytechnic Campus	0.58	2024-07-11	6 am-9:30 am	774	House Finch		Trashcan
35	33.433858, -111.901721	Tempe Marketplace	0.96	2024-07-07	6 am-9:30 am	433	House Finch	House Sparrow	Trashcan
36	33.433909, -111.901861	Tempe Marketplace	0.96	2024-07-07	6 am-9:30 am	246	House Finch		Trashcan
37	33.45543, -111.67874	Mesa Community College Red Mountain Campus	0.69	2024-09-15	7:30am-9:30am	123	House Finch		Trashcan
38	33.42289, -111.92563	Tempe Lot 59 East & ASU Practice Fields	0.81	2024-09-18	6:45-9:30am	157	House Finch	Great-Tailed Grackle	Trashcan
39	33.42260, -111.92566	Tempe Lot 59 East & ASU Practice Fields	0.81	2024-09-18	6:45-9:30am	117	House Finch		Trashcan
40	33.60842, -112.16248	ASU West Campus	0.7	2024-10-06	6:50-9:50am	150	House Finch	House Sparrow, Gila Woodpecker	Trashcan
41	33.432603, -111.904725	Tempe Marketplace	0.96	2024-07-07	6 am-9:30 am	17	House Sparrow		Trashcan										17
42	33.432646, -111.904411	Tempe Marketplace	0.96	2024-07-07	6 am-9:30 am	326	House Sparrow		Trashcan										326
43	33.433483, -111.901755	Tempe Marketplace	0.96	2024-07-07	6 am-9:30 am	316	House Sparrow	House Finch	Trashcan										316
44	33.433118, -111.903371	Tempe Marketplace	0.96	2024-07-07	6 am-9:30 am	16	House Sparrow		Trashcan										16
45	33.425765, -111.939875	S Mill Ave & E 5th St Intersection	0.81	2024-09-20	6:30-9:45am	708	House Sparrow		Trashcan										708
46	33.425342, -111.940131	S Mill Ave & E 5th St Intersection	0.81	2024-09-20	6:30-9:45am	208	House Sparrow		Trashcan										208
47	33.453710, -112.072661	Civic Space Park	0.8	2024-10-13	7-9:30am	103	House Sparrow		Trashcan										103
48	33.220664, -111.583149	Queen Creek Olive Mill	0.28	2024-07-23	6 am- 9:30 am	897	Mourning Dove		Trashcan
49	33.220214, -111.583234	Queen Creek Olive Mill	0.28	2024-07-23	6 am- 9:30 am	890	Mourning Dove	Great-Tailed Grackle	Trashcan
50	33.22454, -111.59067	Schnepf Farms	0.4	2024-09-08	7:30am-9:30 am	82	Mourning Dove	House Sparrow, Abert's Towhee, White-Crowned Sparrow	Trashcan
51	33.23648, -111.77017	Veterans Oasis Park	0.34	2024-08-06	7 am-9 am	134	Mourning Dove	Great-Tailed Grackle	Trashcan
52	33.23453, -111.76915	Veterans Oasis Park	0.34	2024-08-11	7:30 am-9:30 am	103	Mourning Dove		Trashcan
53	33.60881, -112.16310	ASU West Campus	0.7	2024-10-06	6:50-9:50am	801	Mourning Dove	Great-Tailed Grackle	Trashcan
54	33.307248, -111.677562	Polytechnic Campus	0.58	2024-07-11	6 am-9:30 am	1200	N/A		Trashcan
55	33.307327, -111.675513	Polytechnic Campus	0.58	2024-07-11	6 am-9:30 am	1200	N/A		Trashcan
56	33.307242, -111.678782	Polytechnic Campus	0.58	2024-07-11	6 am-9:30 am	1200	N/A		Trashcan
57	33.307563, -111.679243	Polytechnic Campus	0.58	2024-07-11	6 am-9:30 am	1200	N/A		Trashcan
58	33.306168, -111.676053	Polytechnic Campus	0.58	2024-07-11	6 am-9:30 am	1200	N/A		Trashcan
59	33.433711, -111.902165	Tempe Marketplace	0.96	2024-07-07	6 am-9:30 am	1200	N/A		Trashcan
60	33.433581, -111.902388	Tempe Marketplace	0.96	2024-07-07	6 am-9:30 am	1200	N/A		Trashcan
61	33.420100, -112.071967	Nina Mason Pulliam Rio Salado Audubon Center	0.24	2024-07-16	8:15 am- 11:40 am	1200	N/A		Bench
62	33.419521, -112.071977	Nina Mason Pulliam Rio Salado Audubon Center	0.24	2024-07-16	8:15 am- 11:40 am	1200	N/A		Sign
63	33.418703, -112.072337	Nina Mason Pulliam Rio Salado Audubon Center	0.24	2024-07-16	8:15 am- 11:40 am	1200	N/A		Trashcan
64	33.423876, -112.071575	Nina Mason Pulliam Rio Salado Audubon Center	0.24	2024-07-16	8:15 am- 11:40 am	1200	N/A		Trashcan
65	33.423542, -112.071010	Nina Mason Pulliam Rio Salado Audubon Center	0.24	2024-07-16	8:15 am- 11:40 am	1200	N/A		Sign
66	33.422368, -112.069861	Nina Mason Pulliam Rio Salado Audubon Center	0.24	2024-07-16	8:15 am- 11:40 am	1200	N/A		Trash on ground
67	33.424004, -112.072817	Nina Mason Pulliam Rio Salado Audubon Center	0.24	2024-07-16	8:15 am- 11:40 am	1200	N/A		Trashcan
68	33.220401, -111.583083	Queen Creek Olive Mill	0.28	2024-07-23	6 am- 9:30 am	1200	N/A		Trashcan
69	33.220650, -111.583658	Queen Creek Olive Mill	0.28	2024-07-23	6 am- 9:30 am	1200	N/A		Trashcan
70	33.220468, -111.583483	Queen Creek Olive Mill	0.28	2024-07-23	6 am- 9:30 am	1200	N/A		Trashcan
71	33.220683, -111.583469	Queen Creek Olive Mill	0.28	2024-07-23	6 am- 9:30 am	1200	N/A		Trashcan
72	33.220874, -111.583839	Queen Creek Olive Mill	0.28	2024-07-23	6 am- 9:30 am	1200	N/A		Trashcan
73	33.220566, -111.582968	Queen Creek Olive Mill	0.28	2024-07-23	6 am- 9:30 am	1200	N/A		Trashcan
74	33.22591, -111.59072	Schnepf Farms	0.4	2024-09-08	7:30am-9:30 am	1200	N/A		Trashcan
75	33.22557, -111.59036	Schnepf Farms	0.4	2024-09-08	7:30am-9:30 am	1200	N/A		Trashcan
76	33.224026, -111.591912	Schnepf Farms	0.4	2024-09-08	7:30am-9:30 am	1200	N/A		Trashcan
77	33.224028, -111.592668	Schnepf Farms	0.4	2024-09-13	7:30am-9:30 am	1200	N/A		Trashcan
78	33.224005, -111.591404	Schnepf Farms	0.4	2024-09-13	7:30am-9:30 am	1200	N/A		Trashcan
79	33.23564, -111.77068	Veterans Oasis Park	0.34	2024-08-06	7 am-9 am	1200	N/A		Trashcan
80	33.23628, -111.76860	Veterans Oasis Park	0.34	2024-08-06	7 am-9 am	1200	N/A		Trashcan
81	33.23579, -111.76745	Veterans Oasis Park	0.34	2024-08-06	7 am-9 am	1200	N/A		Trashcan
82	33.23461, -111.77109	Veterans Oasis Park	0.34	2024-08-11	7:30 am-9:30 am	1200	N/A		Trashcan
83	33.23508, -111.76851	Veterans Oasis Park	0.34	2024-08-11	7:30 am-9:30 am	1200	N/A		Trashcan
84	33.30963, -111.74368	Santan Village	0.9	2024-08-09	6:30 am-9 am	1200	N/A		Trashcan
85	33.30805, -111.74317	Santan Village	0.9	2024-08-09	6:30 am-9 am	1200	N/A		Trashcan
86	33.30914, -111.74289	Santan Village	0.9	2024-08-09	6:30 am-9 am	1200	N/A		Trashcan
87	33.30983, -111.74256	Santan Village	0.9	2024-08-28	7am-9 am	1200	N/A		Trashcan
88	33.36453, -111.93482	Kiwanis Park	0.26	2024-09-02	6:30am- 8:30am	1200	N/A		Trashcan
89	33.36441, -111.93404	Kiwanis Park	0.26	2024-09-02	6:30am- 8:30am	1200	N/A		Trashcan
90	33.36518, -111.93595	Kiwanis Park	0.26	2024-09-06	7:30am-9:30am	1200	N/A		Trashcan
91	33.36431, -111.93568	Kiwanis Park	0.26	2024-09-06	7:30am-9:30am	1200	N/A		Trashcan
92	33.36481, -111.93544	Kiwanis Park	0.26	2024-09-06	7:30am-9:30am	1200	N/A		Trashcan
93	33.45493, -111.67848	Mesa Community College Red Mountain Campus	0.69	2024-09-15	7:30am-9:30am	1200	N/A		Trashcan
94	33.45506, -111.67905	Mesa Community College Red Mountain Campus	0.69	2024-09-15	7:30am-9:30am	1200	N/A		Trashcan
95	33.45529, -111.67850	Mesa Community College Red Mountain Campus	0.69	2024-09-15	7:30am-9:30am	1200	N/A		Trashcan
96	33.45578, -111.67833	Mesa Community College Red Mountain Campus	0.69	2024-09-15	7:30am-9:30am	1200	N/A		Trashcan
97	33.45564, -111.67853	Mesa Community College Red Mountain Campus	0.69	2024-09-15	7:30am-9:30am	1200	N/A		Trashcan
98	33.42562, -111.92458	Tempe Lot 59 East & ASU Practice Fields	0.81	2024-09-18	6:45-9:30am	1200	N/A		Trashcan
99	33.42552, -111.92501	Tempe Lot 59 East & ASU Practice Fields	0.81	2024-09-18	6:45-9:30am	1200	N/A		Trashcan
100	33.41685, -111.93124	ASU SDFC Fields and Surrounding Area	0.81	2024-09-20	6:30-9:45am	1200	N/A		Trashcan
101	33.41590, -111.93179	ASU SDFC Fields and Surrounding Area	0.81	2024-09-20	6:30-9:45am	1200	N/A		Trashcan
102	33.425369, -111.939874	S Mill Ave & E 5th St Intersection	0.81	2024-09-20	6:30-9:45am	1200	N/A		Trashcan
103	33.426391, -111.940164	S Mill Ave & E 5th St Intersection	0.81	2024-09-20	6:30-9:45am	1200	N/A		Trashcan
104	33.425628, -111.940177	S Mill Ave & E 5th St Intersection	0.81	2024-09-20	6:30-9:45am	1200	N/A		Trashcan
105	33.38276, -112.30298	Base & Meridian	0.36	2024-10-09	6:30-9:15am	1200	N/A		Trash on ground
106	33.38228, -112.30626	Base & Meridian	0.36	2024-10-09	6:30-9:15am	1200	N/A		Trash on ground
107	33.37976, -112.30701	Base & Meridian	0.36	2024-10-09	6:30-9:15am	1200	N/A		Trash on ground
108	33.60790, -112.16374	ASU West Campus	0.7	2024-10-06	6:50-9:50am	1200	N/A		Trashcan
109	33.60762, -112.16192	ASU West Campus	0.7	2024-10-06	6:50-9:50am	1200	N/A		Trashcan
110	33.60844, -112.16134	ASU West Campus	0.7	2024-10-06	6:50-9:50am	1200	N/A		Trashcan
111	33.60891, -112.15998	ASU West Campus	0.7	2024-10-06	6:50-9:50am	1200	N/A		Trashcan
112	33.60794, -112.16043	ASU West Campus	0.7	2024-10-06	6:50-9:50am	1200	N/A		Trashcan
113	33.60845, -112.15998	ASU West Campus	0.7	2024-10-06	6:50-9:50am	1200	N/A		Trashcan
114	33.453297, -112.074652	Civic Space Park	0.8	2024-10-13	7-9:30am	1200	N/A		Trashcan
115	33.453029, -112.074478	Civic Space Park	0.8	2024-10-13	7-9:30am	1200	N/A		Trashcan
116	33.453457, -112.073198	Civic Space Park	0.8	2024-10-13	7-9:30am	1200	N/A		Trashcan
117	33.454058, -112.072823	Civic Space Park	0.8	2024-10-13	7-9:30am	1200	N/A		Trashcan
118	33.36828, -111.93548	Kiwanis Park	0.26	2024-09-02	6:30am- 8:30am	328	Northern Mockingbird		Trashcan
119	33.423923, -112.072251	Nina Mason Pulliam Rio Salado Audubon Center	0.24	2024-07-16	8:15 am- 11:40 am	1	Rock Pigeon		Trashcan
120	33.42354, -111.92567	Tempe Lot 59 East & ASU Practice Fields	0.81	2024-09-18	6:45-9:30am	362	Rock Pigeon		Trashcan
121	33.60752, -112.16018	ASU West Campus	0.7	2024-10-06	6:50-9:50am	113	Rock Pigeon		Trashcan
122	33.453591, -112.074970	Civic Space Park	0.8	2024-10-13	7-9:30am	152	Rock Pigeon		Trashcan
123	33.37863, -112.30768	Base & Meridian	0.36	2024-10-09	6:30-9:15am	843	Rock wren		Trashcan
124	33.37817, -112.30834	Base & Meridian	0.36	2024-10-09	6:30-9:15am	151	Rock wren		Trashcan
125	33.420528, -112.072789	Nina Mason Pulliam Rio Salado Audubon Center	0.24	2024-07-16	8:15 am- 11:40 am	930	White-Winged Dove		Trashcan
126	33.220326, -111.583392	Queen Creek Olive Mill	0.28	2024-07-23	6 am- 9:30 am	123	White-Winged Dove	Inca Dove	Trashcan
